# Supplementary material for: Spindle Assembly Checkpoint Protein Dynamics Reveal Conserved and Unsuspected Roles in Plant Cell Division
Source: PubMed Central journal article supplement (PMC2728542; doi:10.1371/journal.pone.0006757), 2009-08-27
Supplement: pone.0006757.s001.pdf [file pone.0006757.s001.pdf]

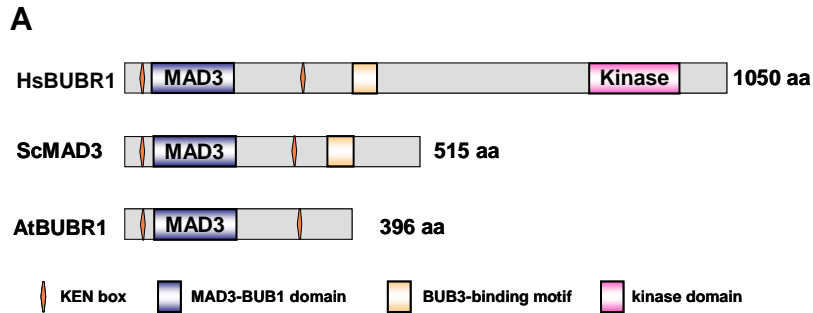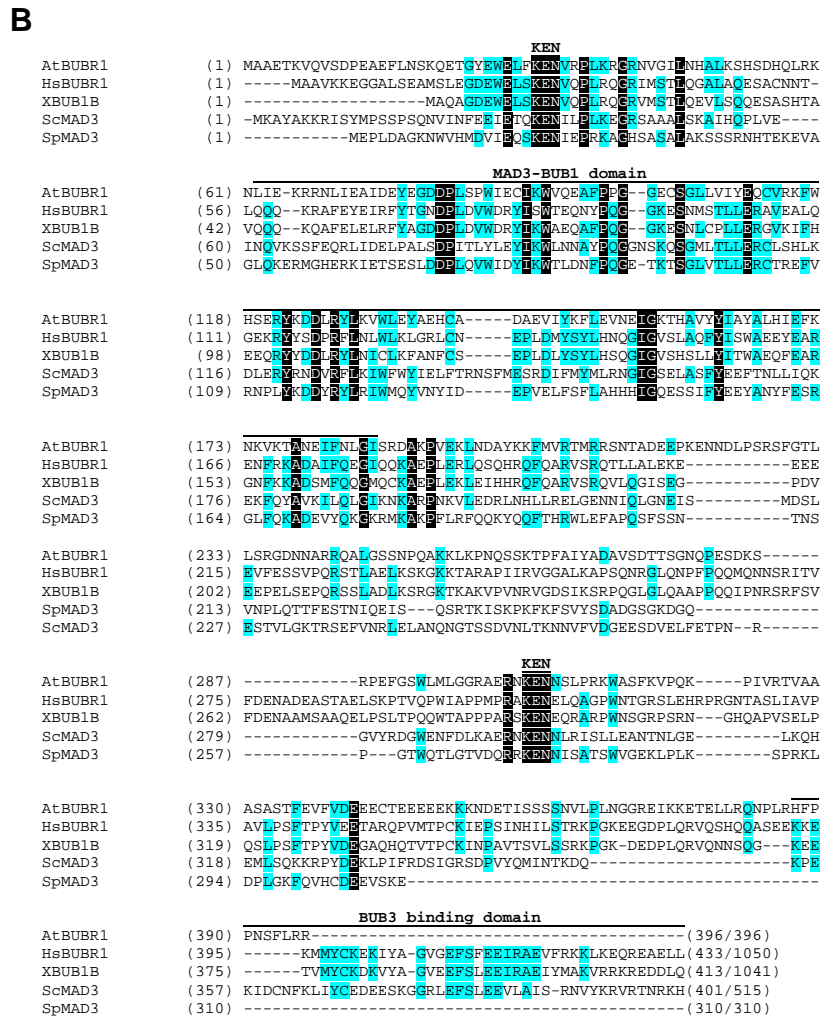

**Figure S1. Sequence comparison of BUBR1/MAD3-related proteins.** (A) Domain organisation of *Arabidopsis thaliana* AtBUBR1, *Homo sapiens* HsBUBR1 and *Saccharomyces cerevisiae* ScMAD3. Proteins are drawn to scale. (B) Alignment of AtBUBR1 protein from *A. thaliana* (AtBUBR1, At2g33560) with MAD3 protein from *Schizosaccharomyces pombe* (SpMAD3, O59767) and the NH2-terminal domains of BUBR1/MAD3 proteins from human (HsBUBR1, O60566), *Xenopus laevis* (XBUB1B, Q8JGT8) and *S. cerevisiae* (ScMAD3, P47074). The MAD3-BUB1 domain (PF08311), KEN boxes and BUB3-binding domain of hBUB1B are indicated.
