# Supplementary material for: Spindle Assembly Checkpoint Protein Dynamics Reveal Conserved and Unsuspected Roles in Plant Cell Division
Source: PubMed Central journal article supplement (PMC2728542; doi:10.1371/journal.pone.0006757), 2009-08-27
Supplement: pone.0006757.s002.pdf [file pone.0006757.s002.pdf]

**A**

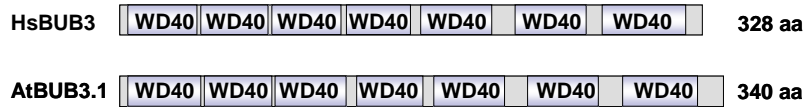

**B**

|          |       | WD-40 #1 |                 | **                                                   |
|----------|-------|----------|-----------------|------------------------------------------------------|
| AtBUB3.1 | (1)   | MTT      | VTPSAGRELSNPPSD | ISNLRFS - NNSDHLVLSWDKRVRL -- YD                     |
| AtBUB3.2 | (1)   | MTL      | VPAIGRELSNPPSD  | ISNLRFS - NNSDHLVLSWDKRVRL -- YD                     |
| DmBUB3   | (1)   | ---      | MRPPEFKLNNPPSD  | ISAVKFGKSNQYMAASWDGTLRF -- YD                        |
| HsBUB3   | (1)   | ---      | MTGSNEFKLNQPPSD | ISVVKFSPNTSQFLVLSWDTSVRL -- YD                       |
| mBUB3    | (1)   | ---      | MTGSNEFKLNQPPSD | ISVVKFSPNTSQFLVLSWDTSVRL -- YD                       |
| XBUB3    | (1)   | ---      | MTGSNEFKLNQPPSD | ISAVKFSPTNSQFLVLSWDSSVRL -- YD                       |
| ScBUB3   | (1)   | ---      | MQIVQIEQAPKDY   | ISDIKIIISKSL - LLLIT                                 |
|          |       | WD-40 #2 |                 | **                                                   |
| AtBUB3.1 | (57)  | HGG      | AVDPCFHD        | -- FSGF SVGADYKVRRIVF - NVGKEDILGTHDKAVRCVEYSYAAG-OV |
| AtBUB3.2 | (56)  | HGG      | AVDPCFHD        | -- SSGF SVCADTKVRIIDF - NAGKEDVLGTHEKAVRCVEYSYAAG-OV |
| DmBUB3   | (54)  | QDA      | PLDQDQMDI       | -- VHVVSGLDNLRLFDV - NTQAESIIQAHEEP                  |
| HsBUB3   | (55)  | HTG      | AVDPCAFYDP      | -- THAWSGGLDHLKMHDL - NTDOENLVGTHDAP                 |
| mBUB3    | (55)  | HTG      | AVDPCAFYDP      | -- THAWSGGLDHLKMHDL - NTDOENLVGTHDAP                 |
| XBUB3    | (55)  | HAG      | PVLDCAFYDP      | -- THAWSGGLDHLKMHDL - NTDOENLVGTHDAP                 |
| ScBUB3   | (55)  | YKH      | PLDQDQMDI       | NTDLQIYVGVTVQGEILKVDLIGSPFQALTNNEANL                 |
|          |       | WD-40 #3 |                 | **                                                   |
| AtBUB3.1 | (114) | ITG      | SWDQTVKLDWR     | RR - GASGPTERTQ -- VGTYLQPE - RVVSM                  |
| AtBUB3.2 | (113) | ITG      | SWDQTVKLDWR     | RR - GASGPTERTQ -- IGTYMOPE - RVNSLSLVGNRLV          |
| DmBUB3   | (111) | ITG      | SWDQTVKLDWR     | RR - EKRK - VGTFEQNNKGVYSMSVIDEKIV                   |
| HsBUB3   | (112) | VITG     | SWDQTVKLDWR     | RR - TPCN - AGTF                                     |
| mBUB3    | (112) | VITG     | SWDQTVKLDWR     | RR - TPCN - AGTF                                     |
| XBUB3    | (112) | VITG     | SWDQTVKLDWR     | RR - TPCN - AGTF                                     |
| ScBUB3   | (116) | IAA      | SWDGLLEVIDR     | PNYDGVIAVKLNLSNNTKVKNKIF                             |
|          |       | WD-40 #4 |                 | **                                                   |
| AtBUB3.1 | (171) | L        | RNM             | SQPE - ORRES                                         |
| AtBUB3.2 | (170) | L        | RNM             | SQPE - ORRES                                         |
| DmBUB3   | (164) | L        | RKM             | DSYI - MKRES                                         |
| HsBUB3   | (164) | L        | RNM             | GYVQ - ORRES                                         |
| mBUB3    | (164) | L        | RNM             | GYVQ - ORRES                                         |
| XBUB3    | (164) | L        | RNM             | GYVQ - ORRES                                         |
| ScBUB3   | (177) | P        | PLCEDD          | NGTIEE                                               |
|          |       | WD-40 #5 |                 | **                                                   |
| AtBUB3.1 | (228) | E        | KCHR            | KEAGRDIVYPVNSIA                                      |
| AtBUB3.2 | (227) | E        | KCHR            | KEAGRDIVYPVNSIA                                      |
| DmBUB3   | (221) | E        | KCHR            | NRNENLEQIYPVNSIA                                     |
| HsBUB3   | (221) | E        | KCHR            | LKENNLEQIYPVNSIA                                     |
| mBUB3    | (221) | E        | KCHR            | LKENNLEQIYPVNSIA                                     |
| XBUB3    | (221) | E        | KCHR            | LKENNLEQIYPVNSIA                                     |
| ScBUB3   | (238) | E        | KCHR            | LNKDNLAYPVNSIA                                       |
|          |       | WD-40 #6 |                 | **                                                   |
| AtBUB3.1 | (287) | S        | ALSF            | SRDGLDAVASSYTFE                                      |
| AtBUB3.2 | (287) | S        | ALSF            | SRDGLDAVASSYTFE                                      |
| DmBUB3   | (280) | S        | TLN             | FSRSDGSAFA                                           |
| HsBUB3   | (280) | S        | ASLAF           | SNDGTTDAVASSYTFE                                     |
| mBUB3    | (280) | S        | ASLAF           | SNDGTTDAVASSYTFE                                     |
| XBUB3    | (280) | S        | ASLAF           | SNDGTTDAVASSYTFE                                     |
| ScBUB3   | (298) | V        | KIA             | CSDNILQD                                             |
|          |       | WD-40 #7 |                 | **                                                   |
| AtBUB3.1 | (340) | S        | ALSF            | SRDGLDAVASSYTFE                                      |
| AtBUB3.2 | (339) | S        | ALSF            | SRDGLDAVASSYTFE                                      |
| DmBUB3   | (326) | S        | TLN             | FSRSDGSAFA                                           |
| HsBUB3   | (328) | S        | ASLAF           | SNDGTTDAVASSYTFE                                     |
| mBUB3    | (326) | S        | ASLAF           | SNDGTTDAVASSYTFE                                     |
| XBUB3    | (324) | S        | ASLAF           | SNDGTTDAVASSYTFE                                     |
| ScBUB3   | (341) | V        | KIA             | CSDNILQD                                             |

**Figure S2. Sequence comparison of BUB3-related proteins.** (A) Domain organisation of *Arabidopsis thaliana* AtBUB3.1 and *Homo sapiens* HsBUB3. (B) Alignment of the BUB3-related proteins from *A. thaliana* (AtBUB3.1, At3g19590; AtBUB3.2, At1g49910), *Drosophila melanogaster* (DmBUB3, NP477381), *Homo sapiens* (HsBUB3, O43684), *Mus musculus* (mBUB3, Q9WVA3), *Xenopus laevis* (XBUB3, Q98UH2) and *Saccharomyces cerevisiae* (ScBUB3, P26449). The WD-40 repeats are underlined and the BUB3 WD signature sequence indicated by asterisks.
