# Supplementary material for: Spindle Assembly Checkpoint Protein Dynamics Reveal Conserved and Unsuspected Roles in Plant Cell Division
Source: PubMed Central journal article supplement (PMC2728542; doi:10.1371/journal.pone.0006757), 2009-08-27
Supplement: pone.0006757.s003.pdf [file pone.0006757.s003.pdf]

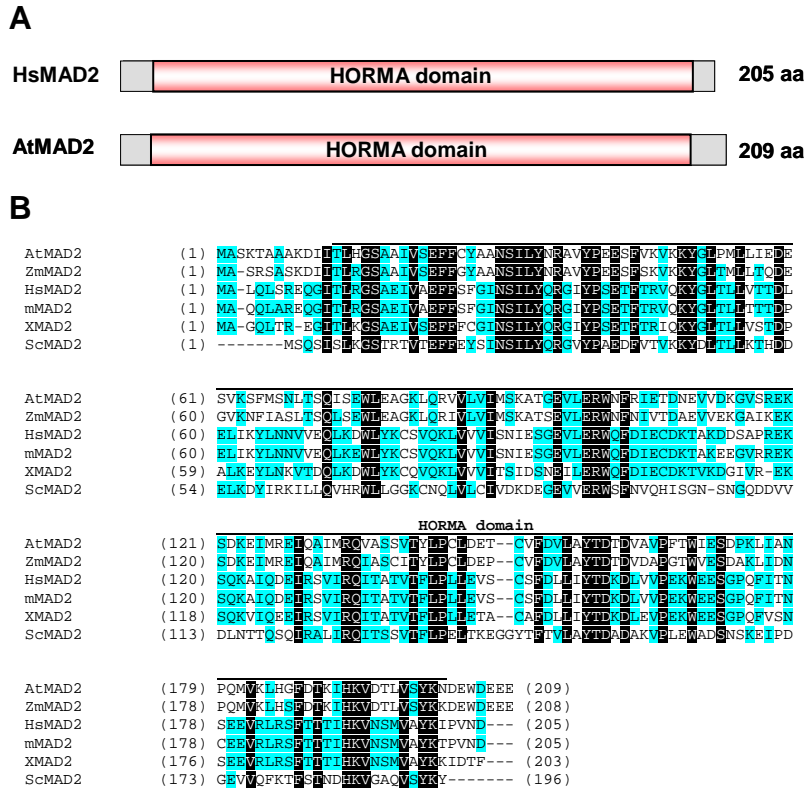

**Figure S3. Sequence comparison of MAD2-related proteins.** (A) Domain organisation of *Arabidopsis thaliana* AtMAD2 and human HsMAD2. (B) Alignment of the MAD2-related proteins from *A. thaliana* (AtMAD2, At3g25980), *Zea mays* (ZmMAD2, Q9XFH3), mouse (mMAD2, Q5HZH8), human (HsMAD2, AAC50781), *Xenopus larvei* (XMAD2, AAB41527) and *Saccharomyces cerevisiae* (ScMAD2, P40958). The HORMA domain (PF02301) is underlined. Identical amino acid residues are colored.
