# Supplementary material for: Spindle Assembly Checkpoint Protein Dynamics Reveal Conserved and Unsuspected Roles in Plant Cell Division
Source: PubMed Central journal article supplement (PMC2728542; doi:10.1371/journal.pone.0006757), 2009-08-27
Supplement: pone.0006757.s005.pdf [file pone.0006757.s005.pdf]

| Gene (AGI)                     | Primer name          | Primer sequence (5'-3')                                    |
|--------------------------------|----------------------|------------------------------------------------------------|
| <b>AtBUB3.1</b><br>(At3g19590) | AtBUB3.1_Promoter 5' | <u>AAAAAGCAGGCTTCGGCAGATGTGTTTTTAAGTCGG</u>                |
|                                | AtBUB3.1_Promoter 3' | <u>AGAAAGCTGGGTGTTTTCCCGTTGAAGATCACA</u>                   |
|                                | AtBUB3.1_E1_ATG      | <u>AAAAAGCAGGCTTCACC</u> <b>ATG</b> ACGACTGTGACTCCGTCC     |
|                                | AtBUB3.1_E1_noATG    | <u>AAAAAGCAGGCTTCACGACTGTGACTCCGTCC</u>                    |
|                                | AtBUB3.1_E9R_STOP    | <u>AGAAAGCTGGGTG</u> <b>TC</b> ACGCCGCAGGATTCGGGTATA       |
|                                | AtBUB3.1_E9R_noSTOP  | <u>AGAAAGCTGGGTGTCCCGCCGCAGGATTCGGGTATA</u>                |
| <b>AtBUB3.2</b><br>(At1g49910) | AtBUB3.2_Promoter 5' | <u>AAAAAGCAGGCTTCGATGTGTGTTGTGTGAGTTACA</u>                |
|                                | AtBUB3.2_Promoter 3' | <u>AGAAAGCTGGGTGCCTGAAAATACGAATTTTTAG</u>                  |
| <b>AtBUBR1</b><br>(At2g33560)  | AtBUBR1_Promoter 5'  | <u>AAAAAGCAGGCTTCATGGAATTCTTAAACGTACGGC</u>                |
|                                | AtBUBR1_Promoter 3'  | <u>AGAAAGCTGGGTGCGTCGTTTCTTCGAGCAAAT</u>                   |
|                                | AtBUBR1_E1_ATG       | <u>AAAAAGCAGGCTTCACC</u> <b>ATGG</b> CAGCCGAAACGAAGGT      |
|                                | AtBUBR1_E1_noATG     | <u>AAAAAGCAGGCTTCACCGCAGCCGAAACGAAGGT</u>                  |
|                                | AtBUBR1_E11R_STOP    | <u>AGAAAGCTGGGTG</u> <b>TC</b> ATCGTAGGAAGCTGTTGGGTGGGAAA  |
|                                | AtBUBR1_E11R_noSTOP  | <u>AGAAAGCTGGGTGTCTTCGTAGGAAGCTGTTGGGTGGGAAA</u>           |
| <b>AtMAD2</b><br>(At3g25980)   | AtMAD2_Promoter 5'   | <u>AAAAAGCAGGCTTCTCTGTGTTTCATATGATGTCAAC</u>               |
|                                | AtMAD2_Promoter 3'   | <u>AGAAAGCTGGGTGGAGTCTAAGGATCGGTGATTT</u>                  |
|                                | AtMAD2_E1_ATG        | <u>AAAAAGCAGGCTTCACC</u> <b>ATGG</b> CGTCCAAAACAGCGGCTGCTA |
|                                | AtMAD2_E1_noATG      | <u>AAAAAGCAGGCTTCGCGTCCAAAACAGCGGCTGCTA</u>                |
|                                | AtMAD2_E7R_STOP      | <u>AGAAAGCTGGGTG</u> <b>TC</b> ATTACTCTTCTTCATCCCCTCGTCC   |
|                                | AtMAD2_E7R_noSTOP    | <u>AGAAAGCTGGGTGTTACTCTTCTTCATCCCCTCGTCC</u>               |
| <b>AtHTR12</b><br>(AT1G01370)  | AtHTR12_E1_ATG       | <u>AAAAAGCAGGCTTC</u> <b>ATGG</b> CGAGAACCAAGCATCGC        |
|                                | AtHTR12_E3_STOP      | <u>AGAAAGCTGGGTG</u> <b>TC</b> ACCATGGTCTGCCTTTTCCTCC      |

**Figure S5. Gateway primers used in this study.**
